# Supplementary material for: One single catalyst, Pd(OAc)2, for two sequential very different steps: allylic alcohol oxidation–Heck reaction. Access to functionalised α,β-unsaturated ketones
Source: Royal Society of Chemistry journal article supplement (doi:10.1039/b810538c), 2008-01-01

Supplementary Material (ESI)

**One single catalyst, Pd(OAc)<sub>2</sub>, for two sequential very different steps : allylic alcohol oxidation/Heck reaction. Access to functionalised  $\alpha,\beta$ -unsaturated ketones.**

Frédéric Batt<sup>a</sup>, Christel Gozzi<sup>b</sup> and Fabienne Fache\*<sup>a</sup>

<sup>a</sup> *Université de Lyon, Université Lyon 1, ICBMS, équipe Cheops, CNRS, UMR 5246, Bât. Raulin, 43 Bd du 11 Nov. 1918, 69622 Villeurbanne cedex France. Fax: 33 472448136; Tel: 33472448521; E-mail: fache@univ-lyon1.fr;*

<sup>b</sup> *Université de Lyon, Laboratoire de Chimie Organométallique de Surface (LCOMS), Ecole Supérieure de Chimie, Physique, Electronique de Lyon (CPE Lyon), 43, Bd du 11 Nov. 1918, BP 82077, 69616 Villeurbanne cedex, France.*

*Fax: 33472431669; Tel: 33472431826 ; E-mail: gozzi@cpe.fr*

**Supplementary informations**

<sup>1</sup>H and <sup>13</sup>C NMR spectra were measured in CDCl<sub>3</sub> on a Bruker AC 300 spectrometer. Mass spectra were recorded on a Finigan-MAT 95 XL instrument; IR spectra were recorded on a Nicolet IR100.

Column chromatography was carried out with silica gel 60A 40-63  $\mu$ m (SDS). All the commercially available products were used as received, without purification or distillation. All the reaction were performed either under oxygen pressure (1 atm) for the oxidation reaction) or under air for the Heck reactions.

**General procedure:** 3% Pd(OAc)<sub>2</sub> and 6% Et<sub>3</sub>N were added to a 1M solution of alcohol **1** in DMA and heated under stirring at 70°C for the appropriate amount of time (generally 4h) under an atmosphere of O<sub>2</sub>. The reaction was monitored by TLC. When all the alcohol was oxidized, the O<sub>2</sub> balloon was removed and 1.1 eq of Et<sub>3</sub>N and 1.1 eq of the iodoaryl compound were added. The reaction mixture was allowed to stir at 70°C under air atmosphere without special cautions until completion. After diethyl ether-water extraction, column chromatography on silica allowed to obtain the product with good isolated yields.

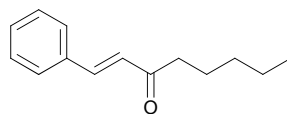

(E)-1-phenyloct-1-en-3-one

**3a** : CAS: 29478-67-4 ;  $^1\text{H}$  NMR  $\text{CDCl}_3$   $\delta$  0.90 (t,  $J = 6.8\text{Hz}$ , 3H), 1.35 (m, 4H), 1.69 (m, 2H), 2.65 (t,  $J = 7.2\text{Hz}$ , 2H), 6.74 (d,  $J = 16.4\text{Hz}$ , 1H), 7.38 (m, 3H), 7.52 (m, 3H);  $^{13}\text{C}$  NMR 14.2, 22.8, 24.3, 31.8, 41.2, 126.6, 128.5, 129.2, 130.6, 134.9, 142.5, 200.9; IR (KBr)  $\nu_{\text{max}}$ : 3060, 2951, 2929, 2862, 1690, 1663, 1622, 1178, 983, 739, 689  $\text{cm}^{-1}$ .

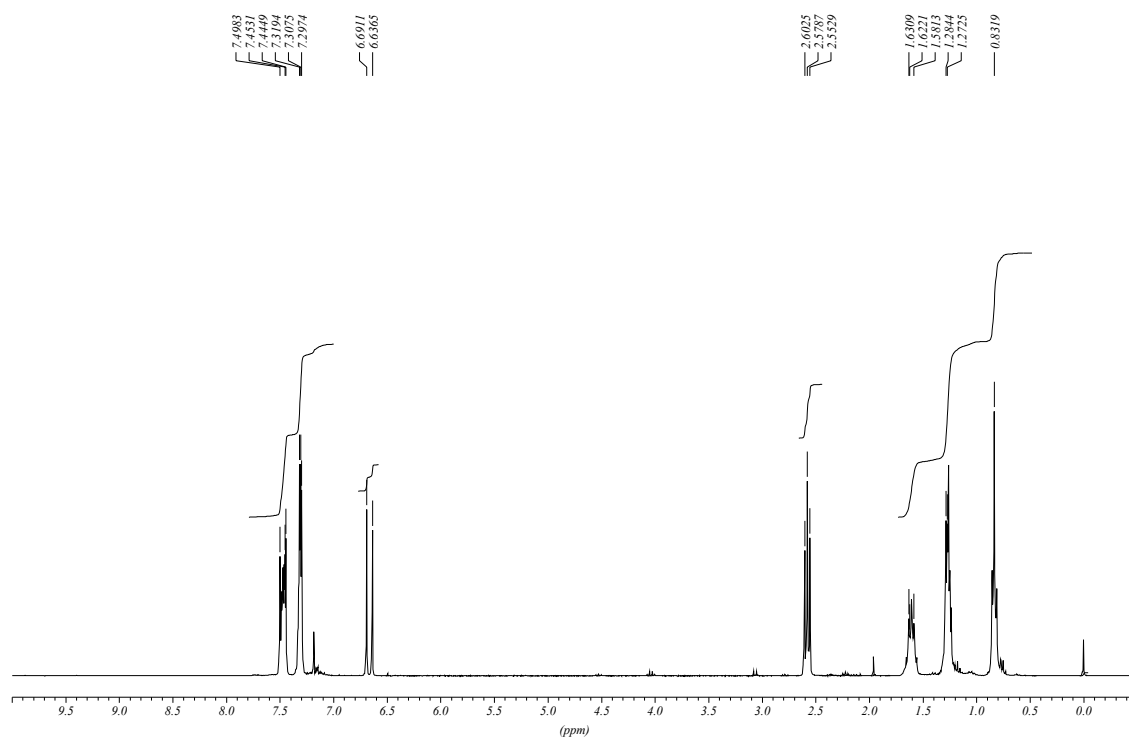

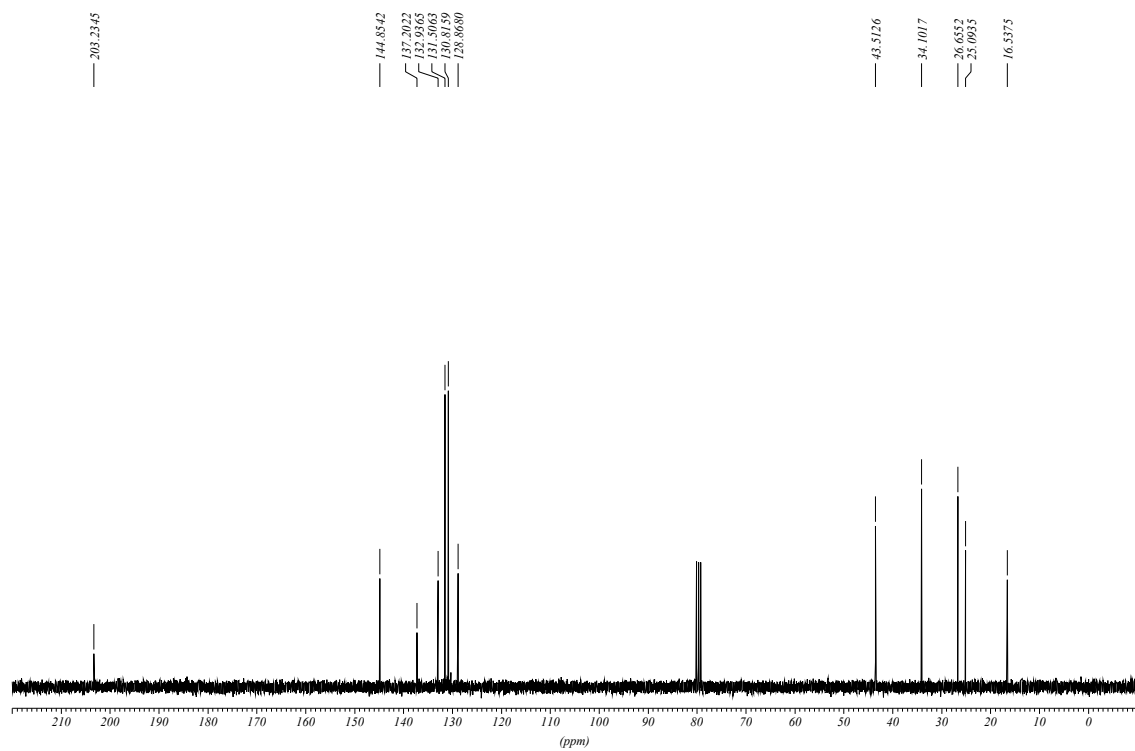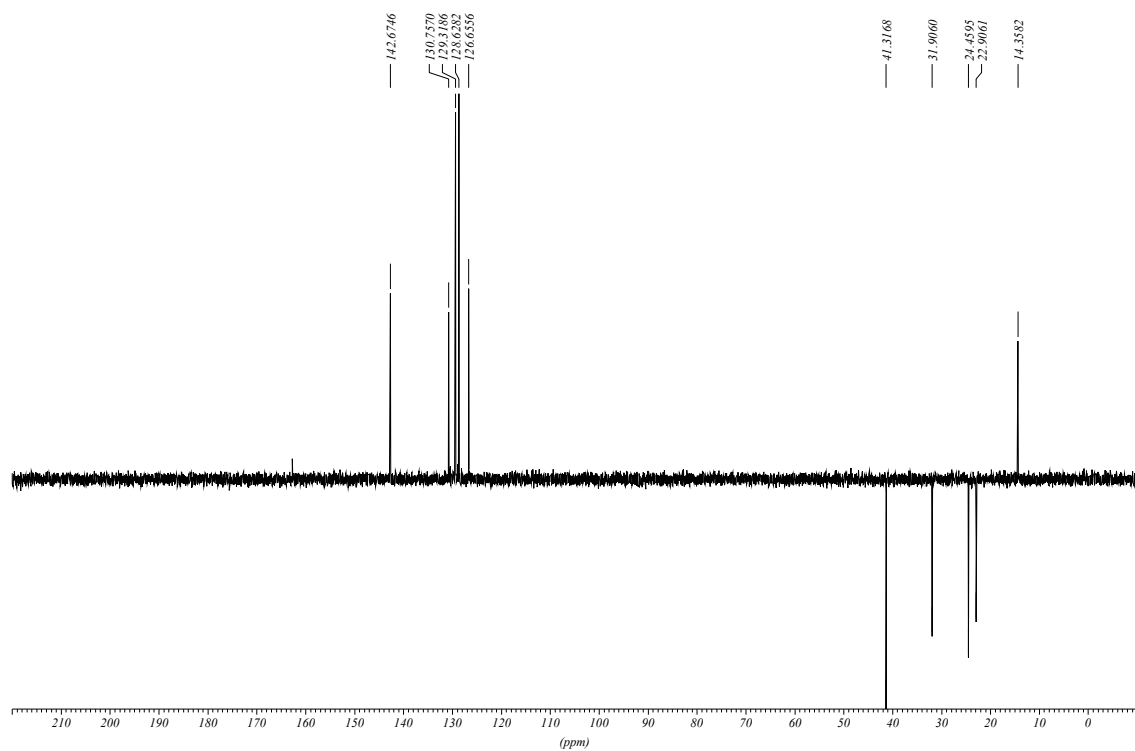

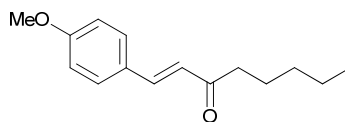

(E)-1-(4-methoxyphenyl)oct-1-en-3-one

**3b** : CAS: 82297-67-4 ;  $^1\text{H}$  NMR  $\text{CDCl}_3$   $\delta$  0.89 (t,  $J = 6.8\text{Hz}$ , 3H), 1.33 (m, 4H), 1.66 (m, 2H), 2.62 (t,  $J = 7.4\text{Hz}$ , 2H), 3.83 (s, 3H), 6.62 (d,  $J = 16\text{Hz}$ , 1H), 6.90 (d,  $J = 8.9\text{Hz}$ , 2H), 7.50 (m, 3H);  $^{13}\text{C}$  NMR 14.3, 22.9, 24.6, 31.9, 41.2, 55.7, 114.7, 124.5, 127.6, 130.3, 142.4, 161.8, 201.1 ; IR (film)  $\nu_{\text{max}}$ : 3039, 3005, 2931, 2860, 1651, 1600, 1512, 1251, 1033, 734  $\text{cm}^{-1}$ .

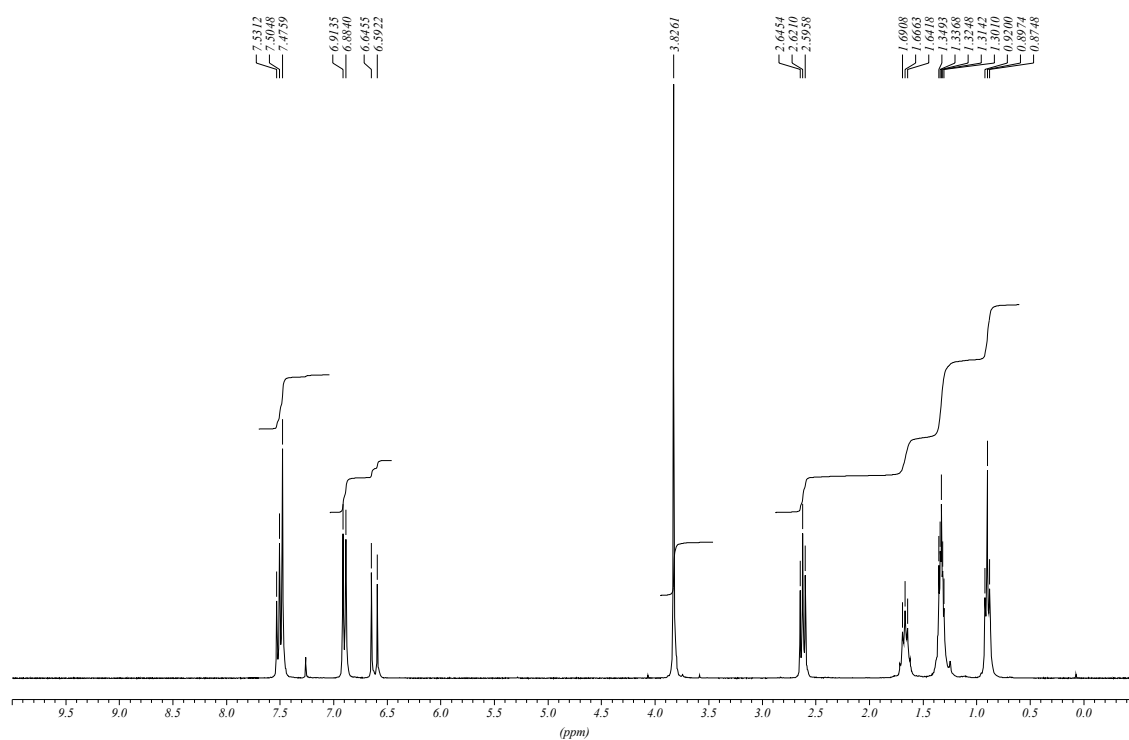

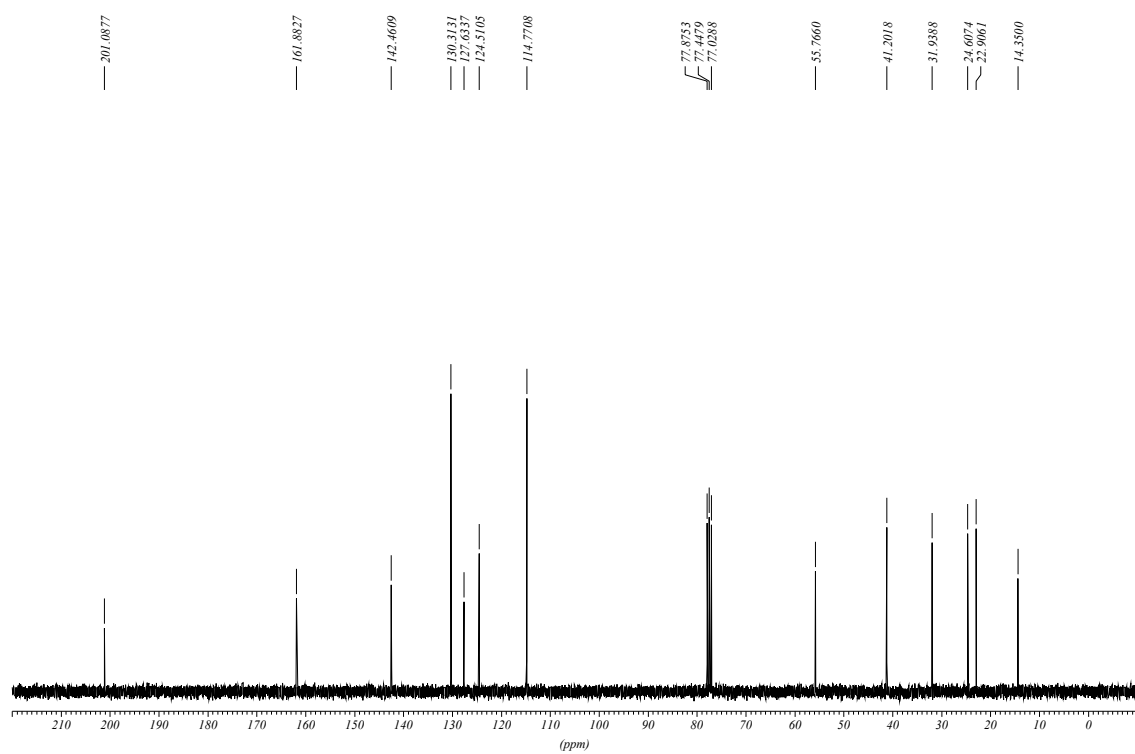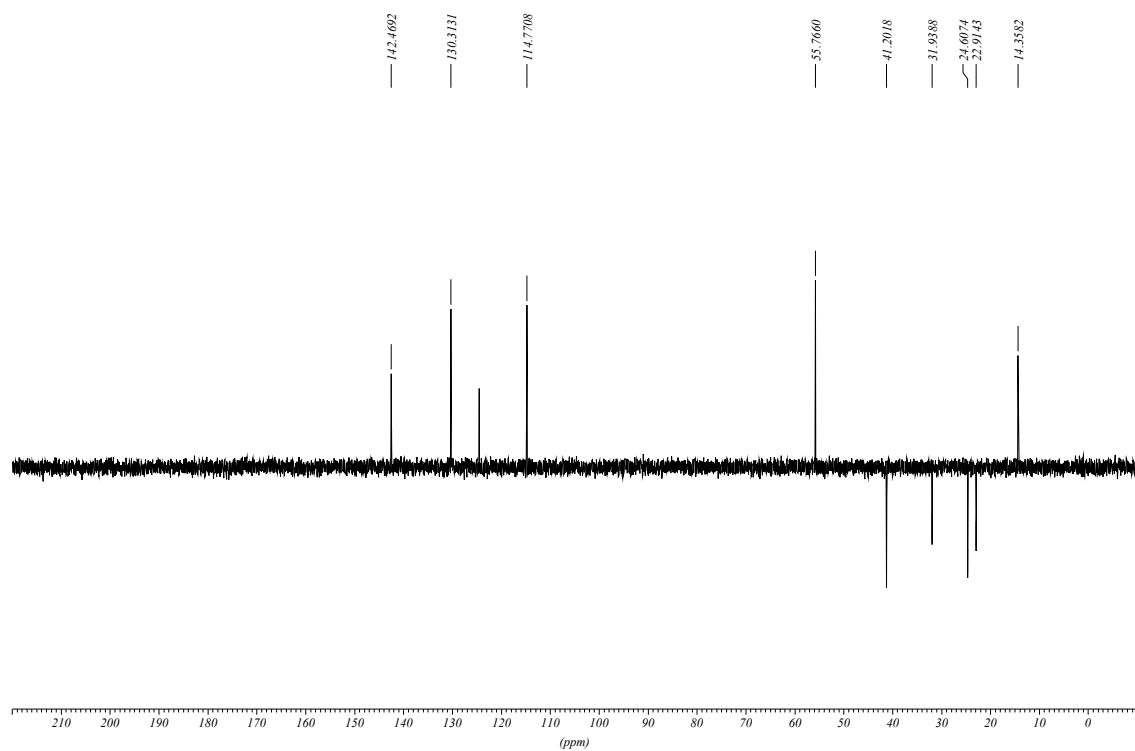

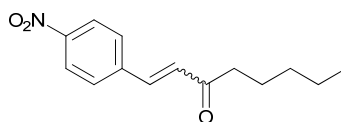

1-(4-nitrophenyl)oct-1-en-3-one

**3c**: CAS: 929719-02-8 ;  $^1\text{H}$  NMR  $\text{CDCl}_3$   $\delta$  0.75 (m, 3H, *cis*) and 0.91 (m, 3H, *trans*), 1.30 (m, 4H, *cis* + *trans*), 1.62 (m, 2H, *cis* + *trans*), 2.43 (t,  $J = 7.5\text{Hz}$ , 2H, *cis*) and 2.62 (t,  $J = 7.4\text{Hz}$ , 2H, *trans*), 6.40 (d,  $J =$ , 1H, *cis*) and 6.83 (d,  $J = 16.2$ , 1H, *trans*), 7.36 (d,  $J = 8.8\text{Hz}$ , 1H, *cis*) and 7.50 (d,  $J = 16.2\text{Hz}$ , 1H, *trans*), 7.62 (d,  $J = 8.6\text{Hz}$ , 2H, *trans*) and 7.71 (d,  $J = 8.8\text{Hz}$ , 1H, *cis*), 8.18 (d,  $J = 8.6\text{Hz}$ , 2H, *trans*) and 8.29 (d,  $J = 7.9\text{Hz}$ , 2H, *cis*), *cis/trans* = 8%;  $^{13}\text{C}$  NMR: 14.1 (*cis*), 14.3 (*trans*), 22.5 (*cis*), 22.8 (*trans*), 24.1, 31.3 (*cis*), 31.8 (*trans*), 70.8 (*trans*), 43.2 (*cis*), 124.5, 129.1, 129.9, 139.3, 141.1, 146.4, 148.7, 200.1, 208.0; IR (KBr)  $\nu_{\text{max}}$ : 2956, 2931, 2857, 1706, 1596, 1514, 1343, 855  $\text{cm}^{-1}$ .

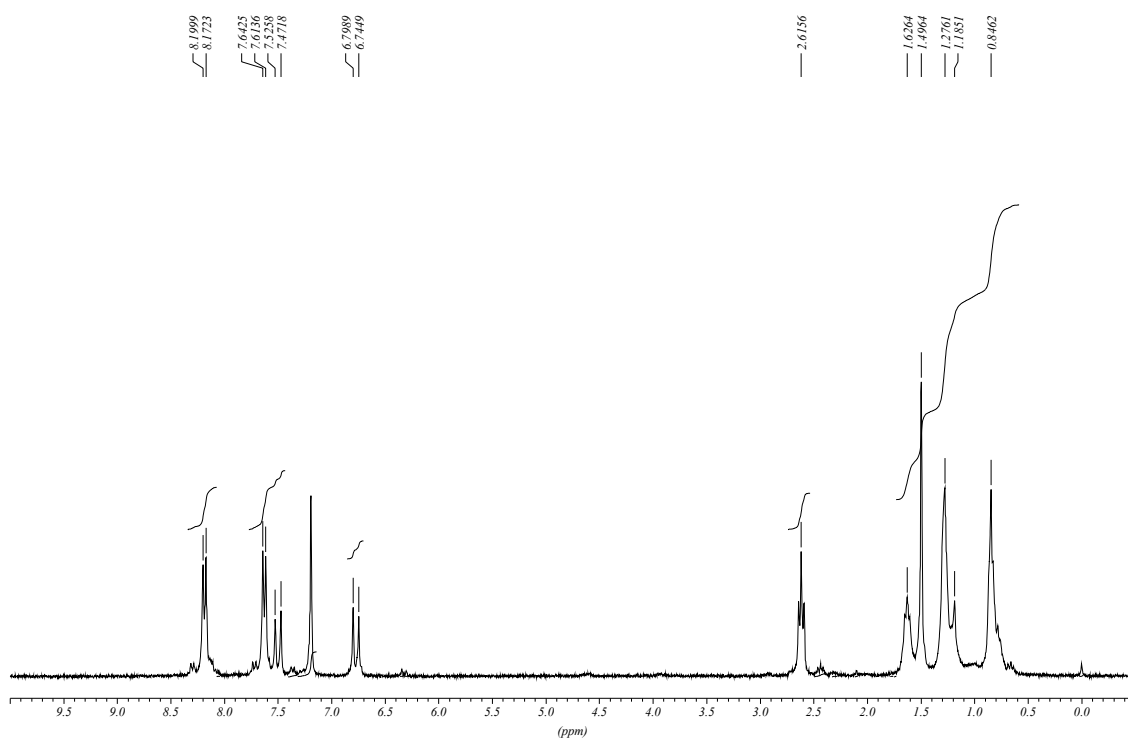

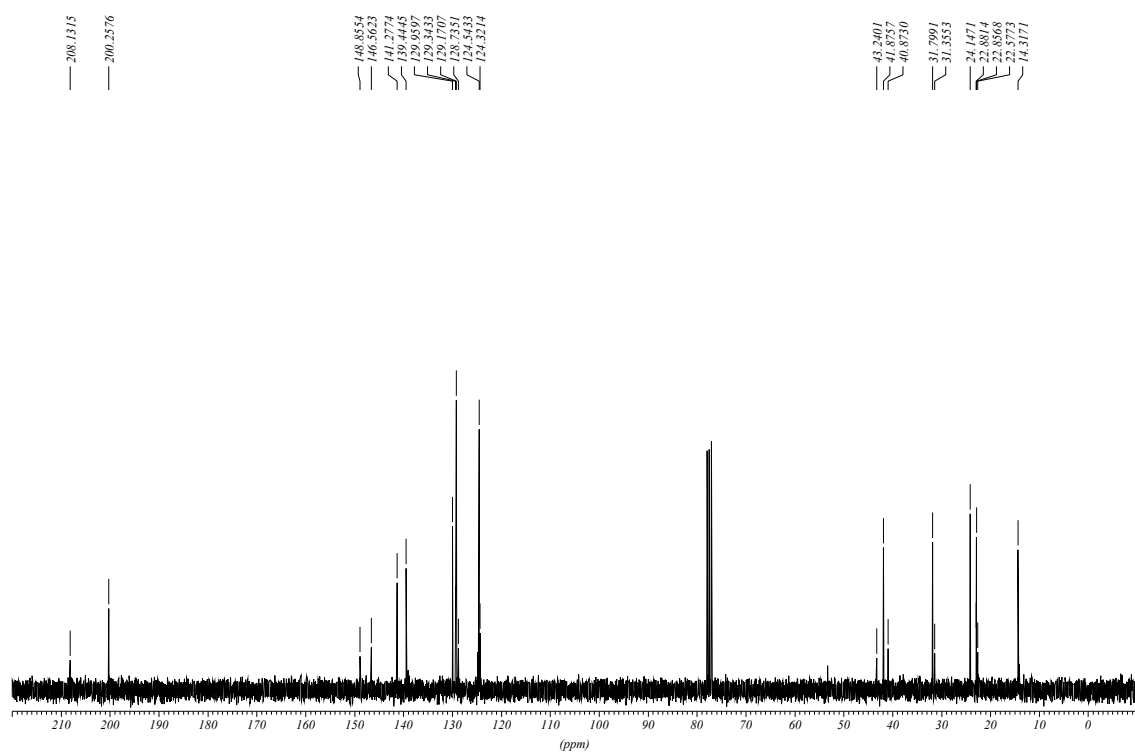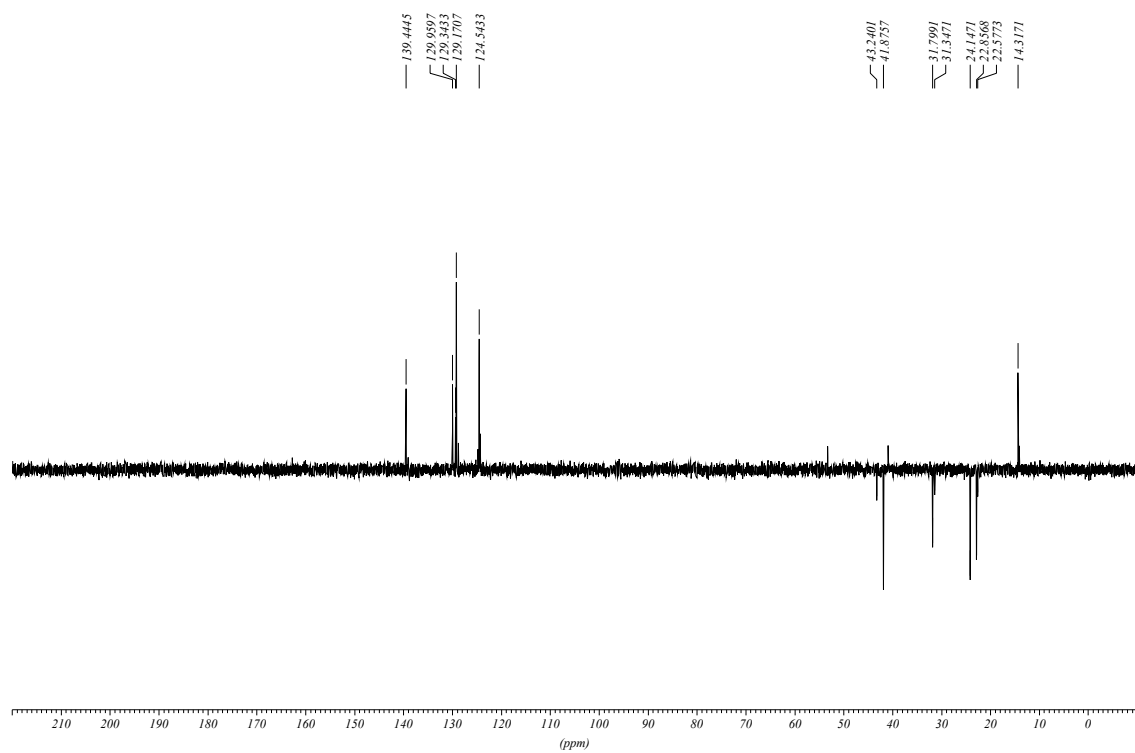

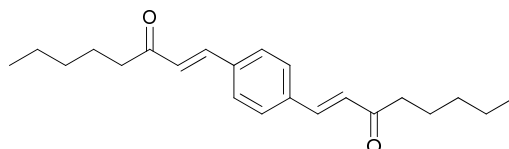

(1E,1'E)-1,1'-(1,4-phenylene)dioc-1-en-3-one

**3d** :  $^1\text{H}$  NMR  $\text{CDCl}_3$   $\delta$  0.89 (t,  $J = 6.8\text{Hz}$ , 6H), 1.34 (m, 8H), 1.67 (m, 4H), 2.65 (t,  $J = 7.5\text{Hz}$ , 4H), 6.76 (d,  $J = 16\text{Hz}$ , 2H), 7.52 (d,  $J = 16\text{Hz}$ , 2H), 7.56 (s, 4H);  $^{13}\text{C}$  NMR 14.2, 22.8, 24.31, 31.7, 41.4, 127.3, 129.0, 136.7, 141.3, 200.7; HRMS calcd for:  $\text{C}_{22}\text{H}_{31}\text{O}_2$  ( $\text{MH}^+$ ) 327.2324 ; found 327.2321 ; IR (KBr)  $\nu_{\text{max}}$  : 2927, 2862, 1688, 1615, 1071  $\text{cm}^{-1}$ .

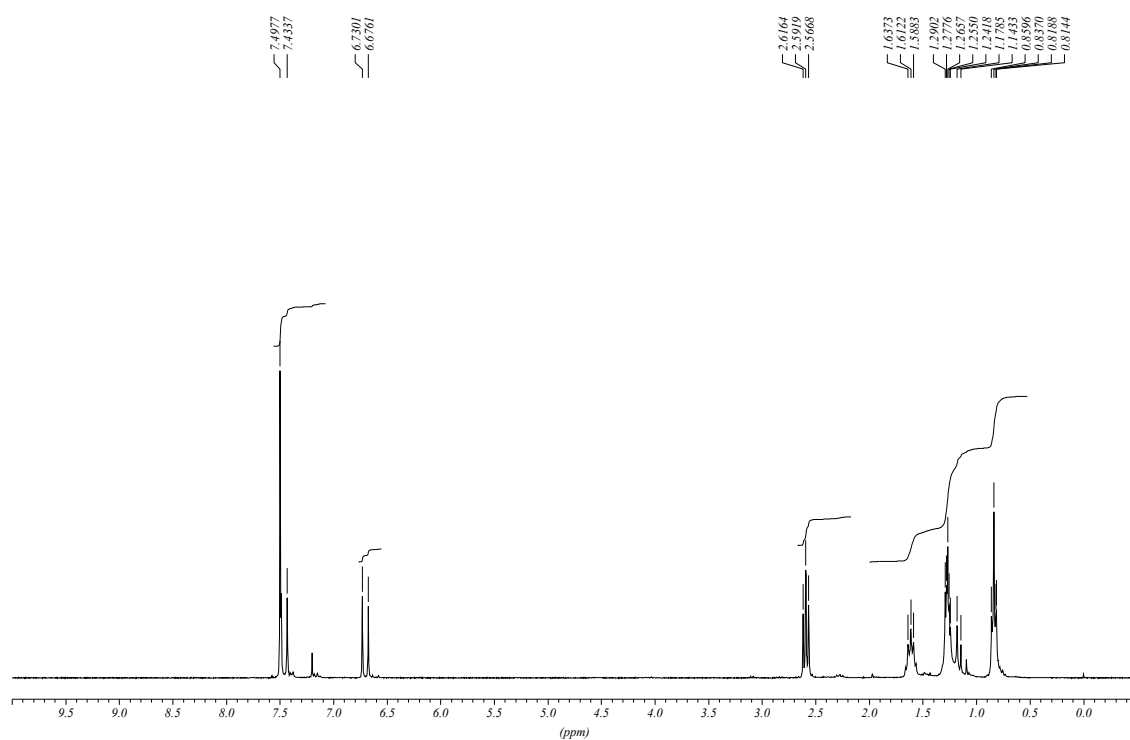



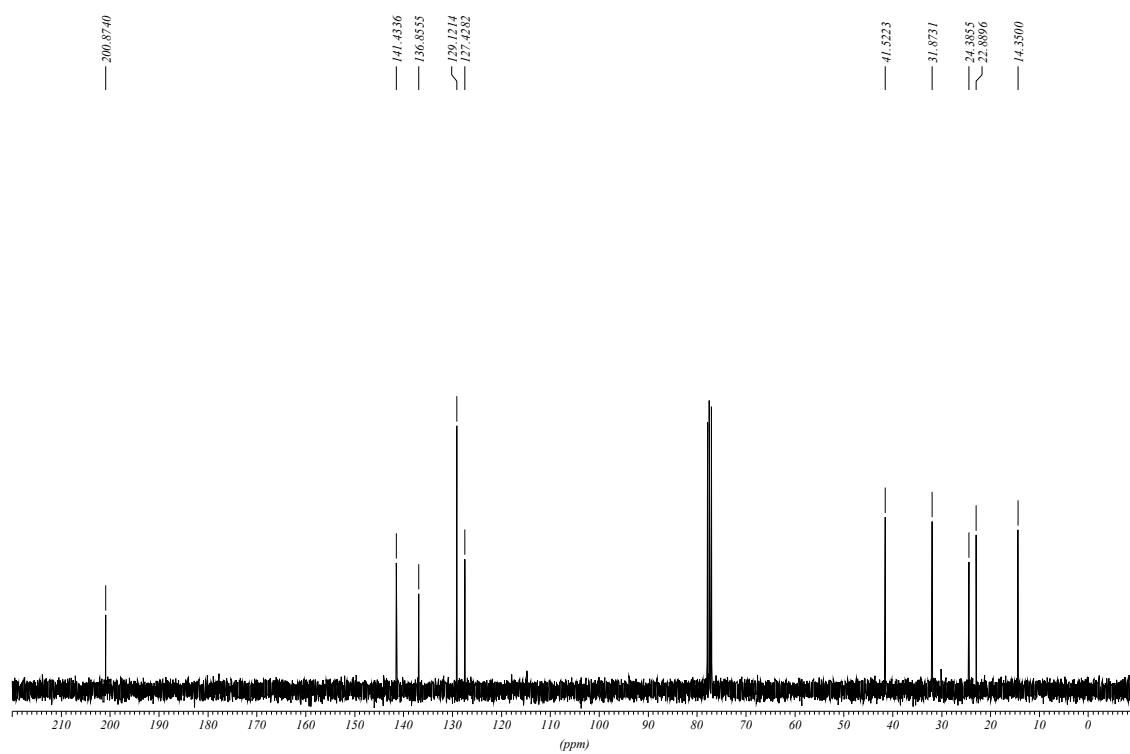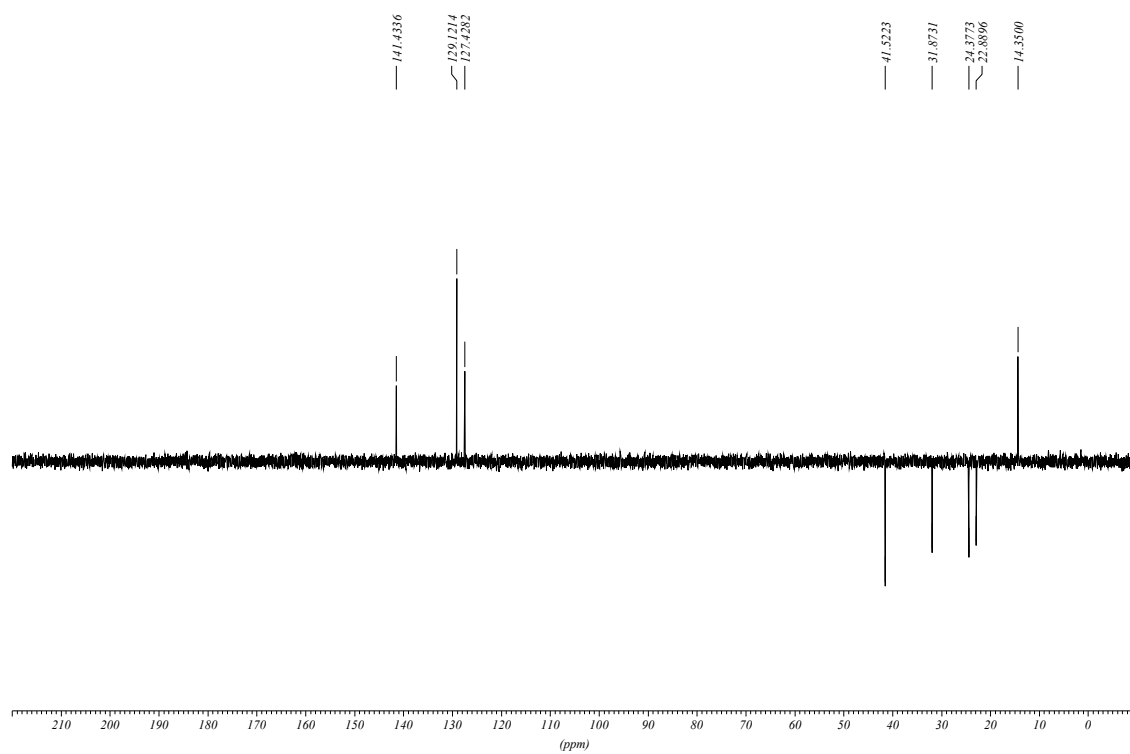

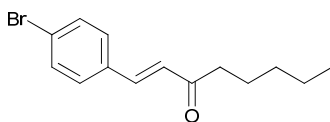

(*E*)-1-(4-bromophenyl)oct-1-en-3-one

**3e**: CAS: 97109-53-0 ;  $^1\text{H}$  NMR  $\text{CDCl}_3$   $\delta$  0.88 (t,  $J = 7\text{Hz}$ , 3H), 1.30 (m, 4H), 1.65 (m, 2H), 2.61 (t,  $J = 7\text{Hz}$ , 2H), 6.69 (d,  $J = 16.2\text{Hz}$ , 1H), 7.41 (m, 5H);  $^{13}\text{C}$  NMR 14.2, 22.7, 24.1, 31.7, 41.3, 124.8, 126.8, 129.8, 132.3, 133.7, 141.0, 200.5; HRMS calcd for:  $\text{C}_{14}\text{H}_{17}\text{BrO}$  ( $\text{M}^+$ ) 280.0463 ; found 280.0462; IR (KBr)  $\nu_{\text{max}}$ : 3060, 2952, 2929, 2862, 1938, 1691, 1664, 1616, 984, 739, 689  $\text{cm}^{-1}$ .

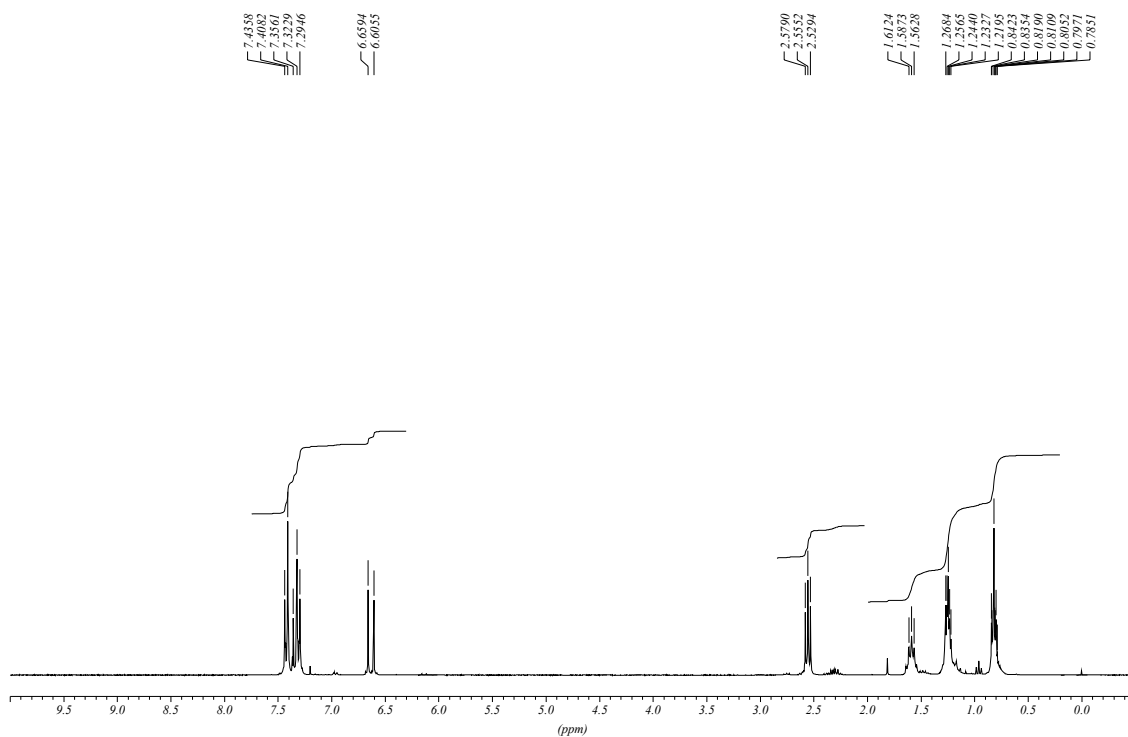

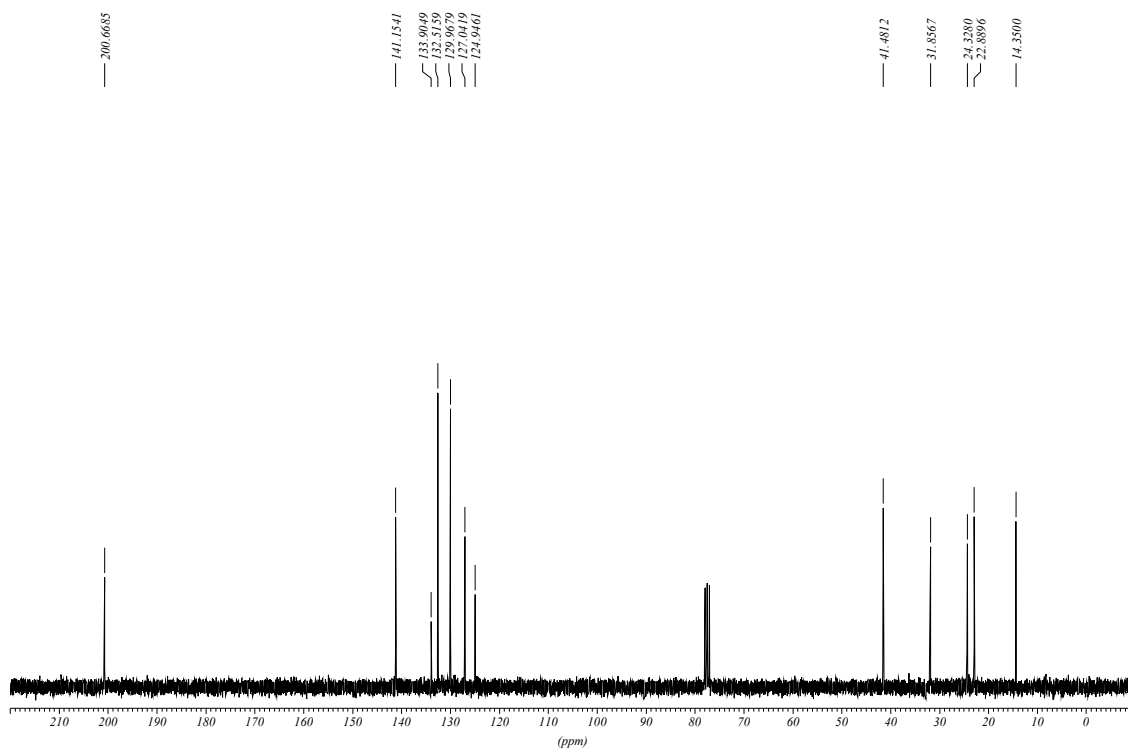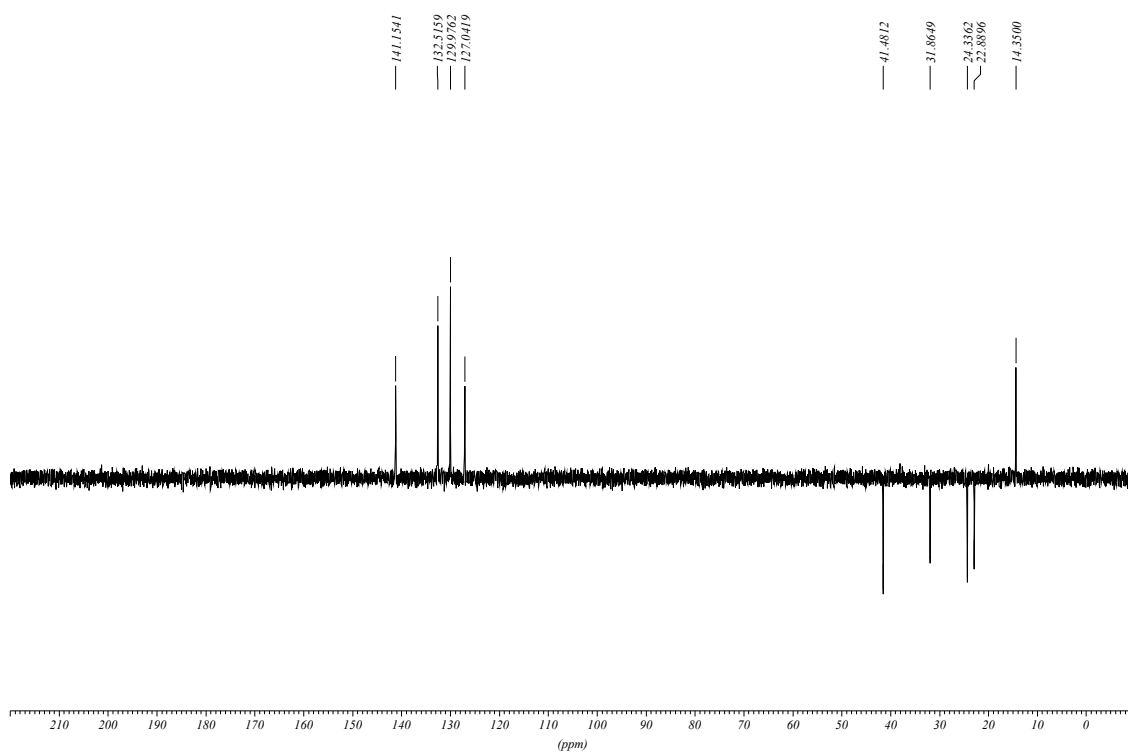

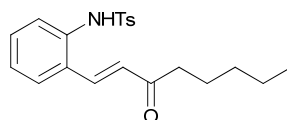

(*E*)-4-methyl-*N*-(2-(3-oxooct-1-enyl)phenyl)benzenesulfonamide

**3f**:  $^1\text{H}$  NMR  $\delta$  0.93 (t,  $J = 6.6\text{Hz}$ , 3H), 1.32 (m, 4H), 1.65 (m, 2H), 2.07 (s, 3H), 2.57 (t,  $J = 7.5\text{Hz}$ , 2H), 6.50 (d,  $J = 16.6\text{Hz}$ , 1H), 7.41 (m, 9H);  $^{13}\text{C}$  NMR 14.2, 21.8, 22.8, 24.1, 31.8, 40.7, 127.4, 127.5, 127.6, 127.8, 128.9, 130.0, 131.2, 136.3, 137.1, 144.3, 201.0; HRMS calcd for:  $\text{C}_{21}\text{H}_{26}\text{NSO}_3$  ( $\text{MH}^+$ ) 372.1633 ; found 372.1628 ; IR (KBr)  $\nu_{\text{max}}$ : 3183, 2955, 2925, 2851, 1679, 1601, 1337, 1163  $\text{cm}^{-1}$ .

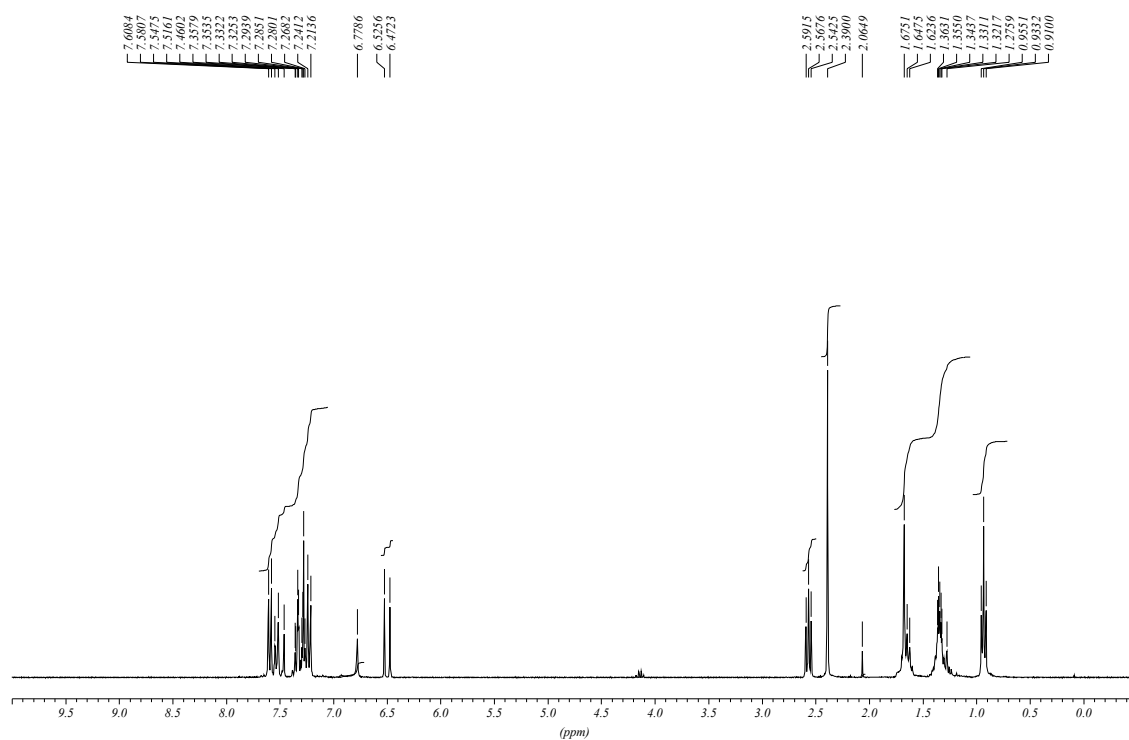

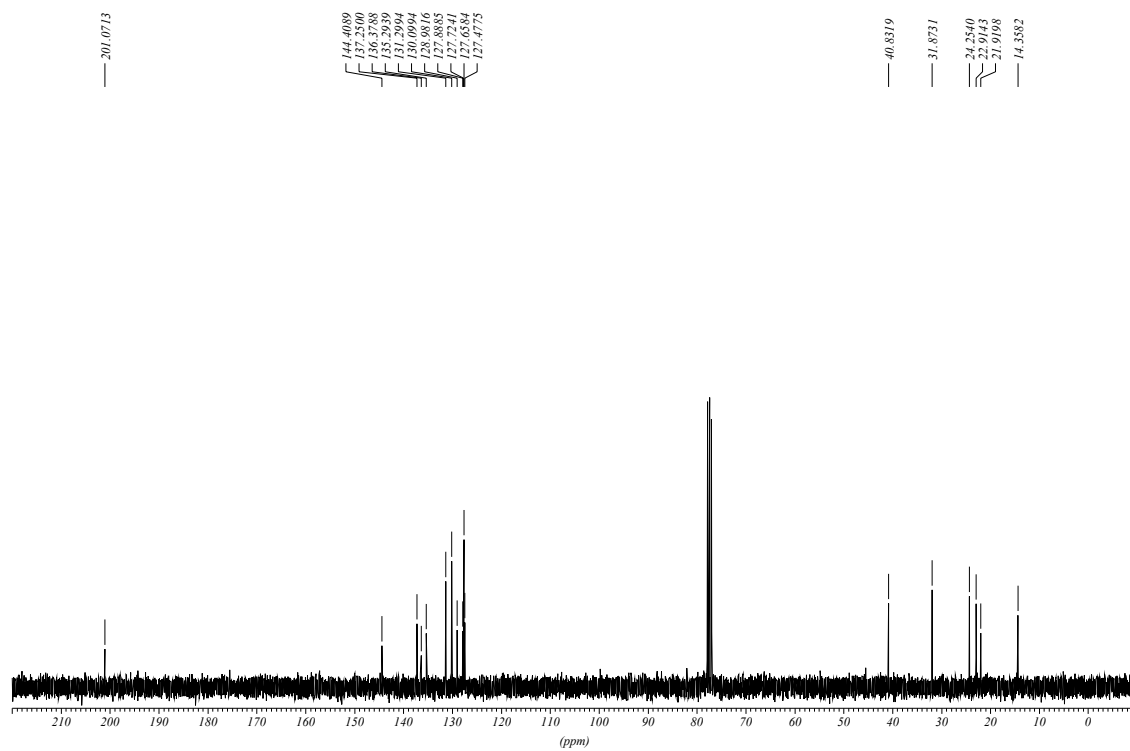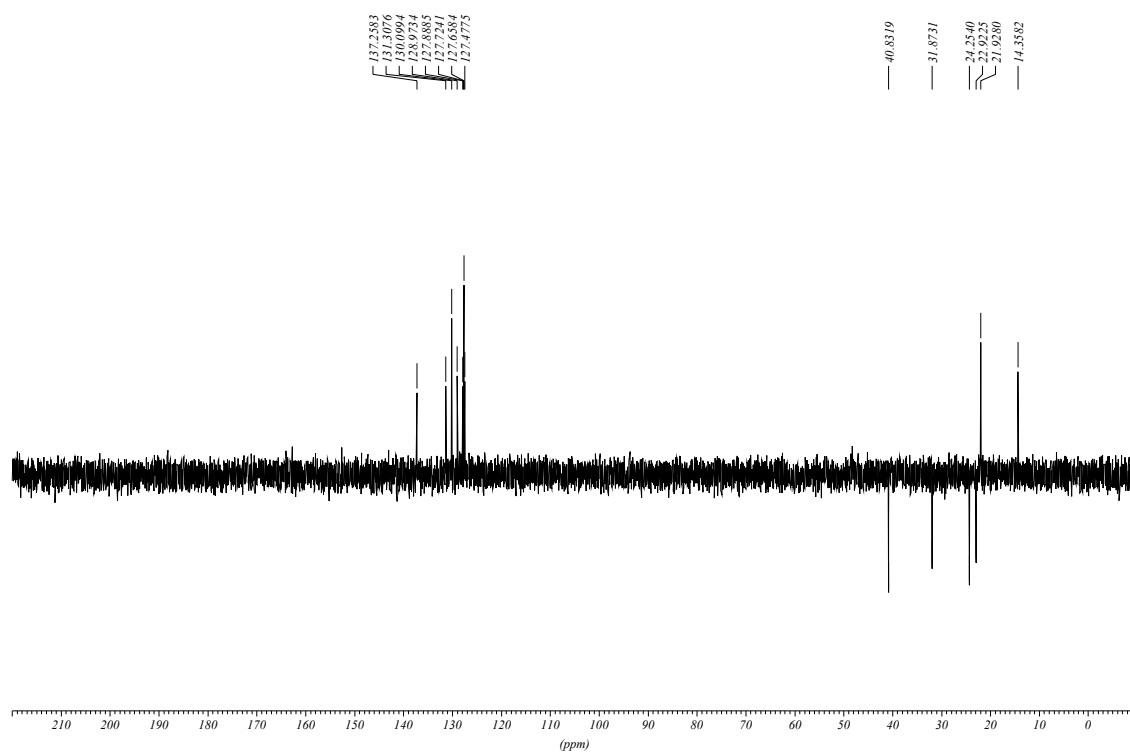

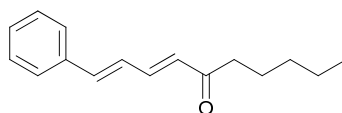

(1E,3E)-1-phenyldeca-1,3-dien-5-one

**3g** : CAS: 121077-67-6 ;  $^1\text{H}$  NMR  $\delta$  0.82 (t,  $J = 6.6$  Hz, 3H), 1.25 (m, 4H), 1.57 (m, 2H), 2.50 (t,  $J = 7.3$  Hz, 2H), 6.19 (d,  $J = 15.4$  Hz, 1H), 6.82 (m, 3H), 7.28 (m, 5H);  $^{13}\text{C}$  NMR 14.2, 22.8, 24.4, 31.8, 41.0, 127.0, 127.4, 127.6, 129.1, 129.4, 129.9, 136.3, 141.3, 142.6, 201.1; IR (KBr)  $\nu_{\text{max}}$ : 2958, 2854, 1680, 1588, 1073, 1005  $\text{cm}^{-1}$ .

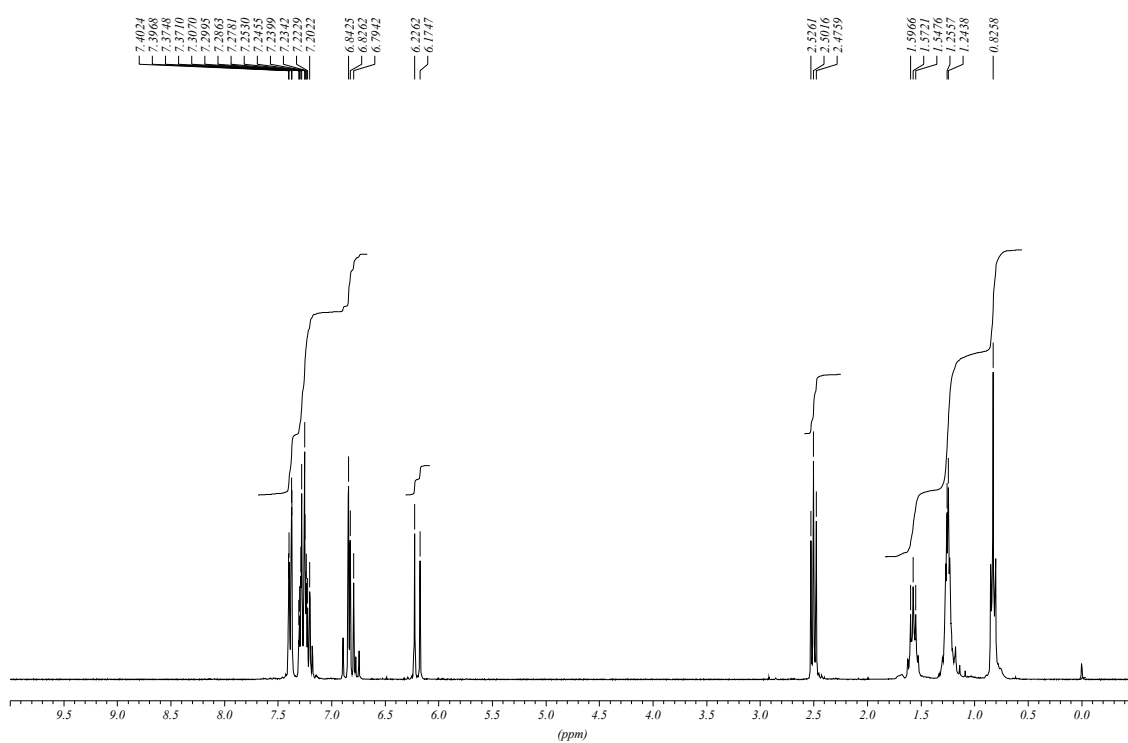

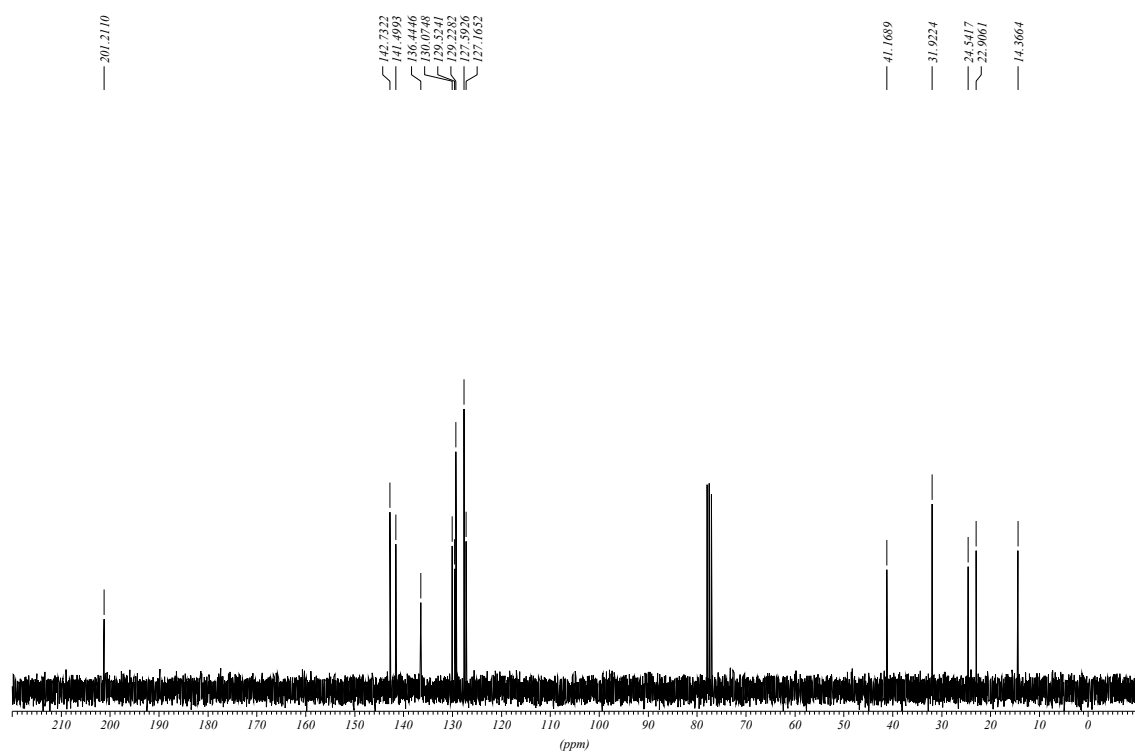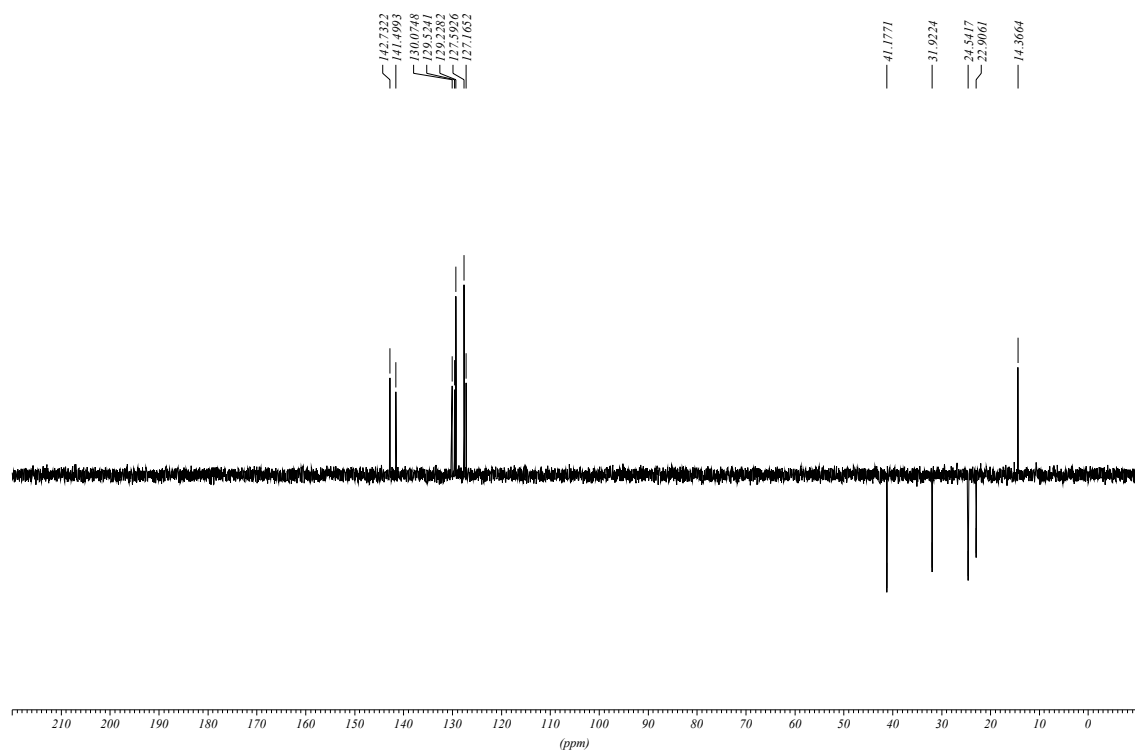

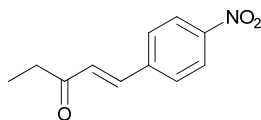

(*E*)-1-(4-nitrophenyl)pent-1-en-3-one

**3h** : CAS: 54951-55-2 ;  $^1\text{H NMR}$   $\delta$  1.10 (t,  $J = 7.2$  Hz, 3H), 2.65 (q,  $J = 7.2$  Hz, 2H), 6.78 (d,  $J = 16.2$  Hz, 1H), 7.50 (d,  $J = 16.2$  Hz, 1H), 7.62 (dd,  $J = 7$  Hz, 1.7 Hz, 2H), 8.17 (dd,  $J = 7$  Hz, 1.7 Hz, 2H);  $^{13}\text{C NMR}$  8.1, 35.0, 124.5, 129.1, 129.7, 139.3, 141.2, 200.5; IR (KBr)  $\nu_{\text{max}}$ : 3110, 2981, 1693, 1667, 1616, 1591, 1510, 1338, 113, 839, 743  $\text{cm}^{-1}$ .

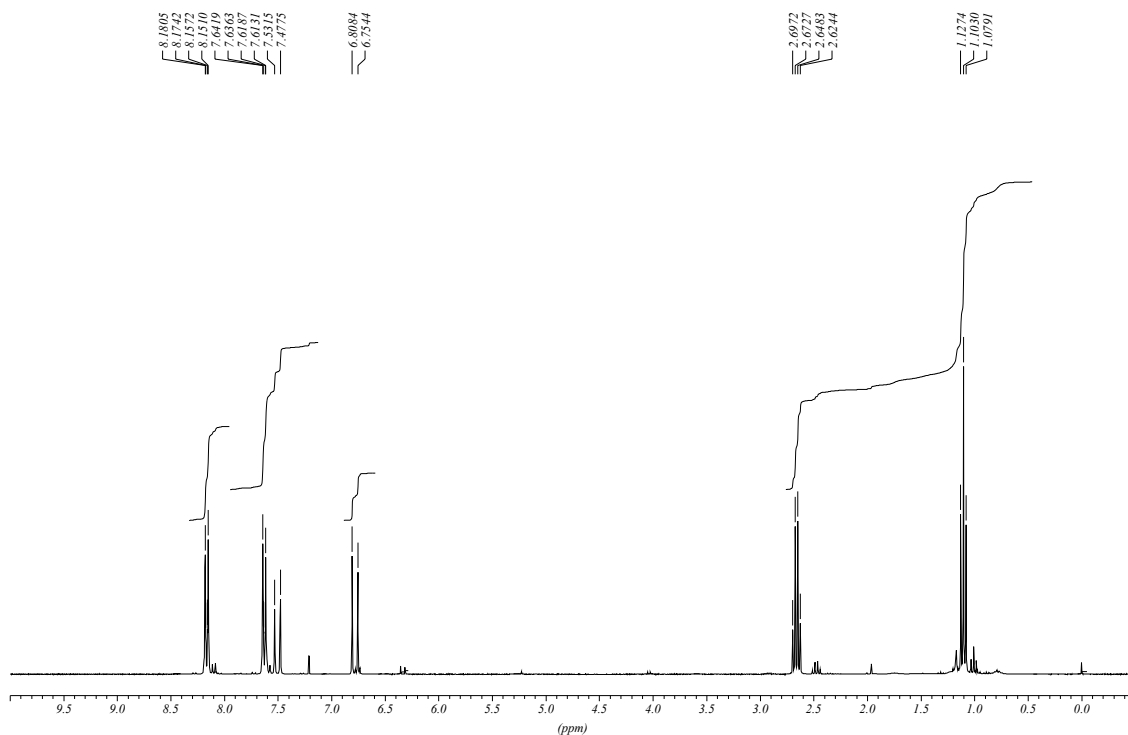



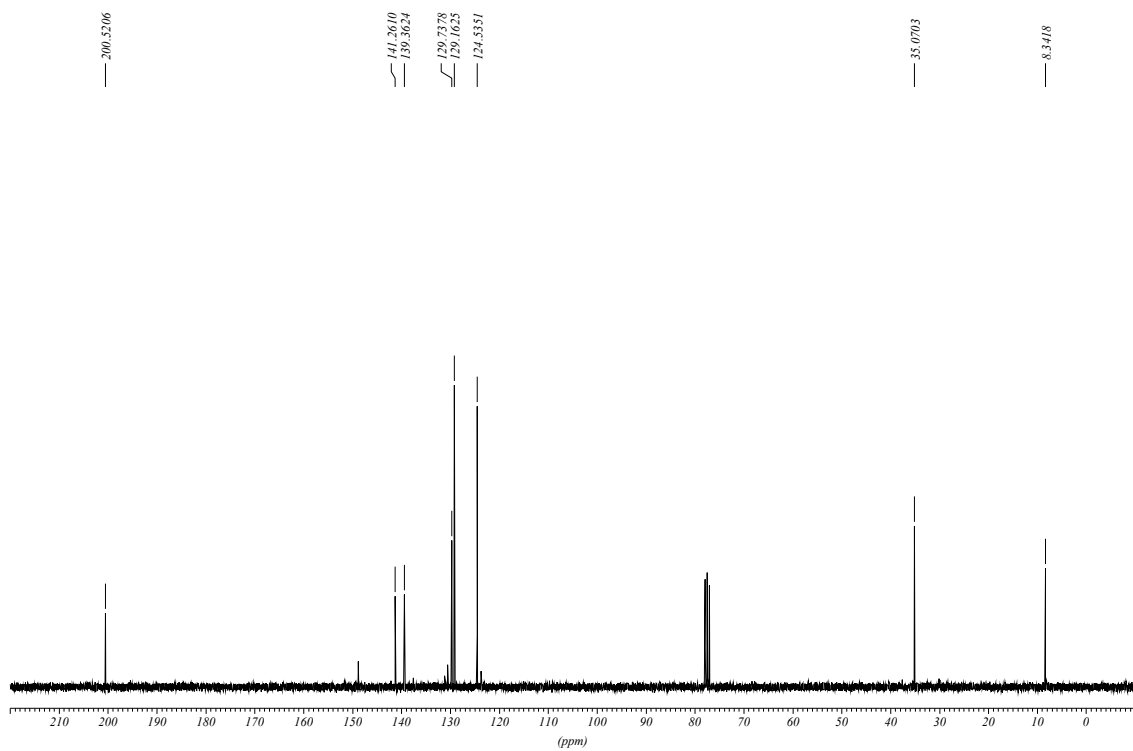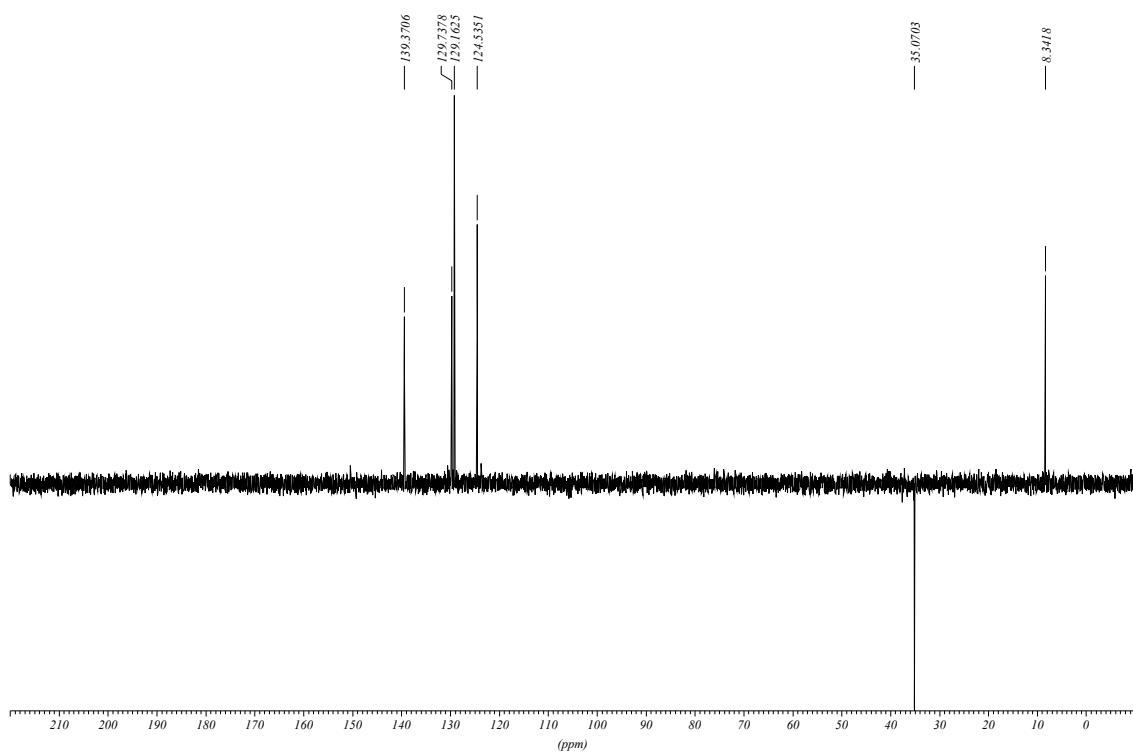

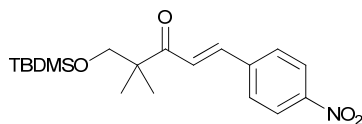

(E)-5-(tert-butyl(dimethyl)silyloxy)-4,4-dimethyl-1-(4-nitrophenyl)pent-1-en-3-one

**3i:**  $^1\text{H}$  NMR  $\delta$  0.02 (s, 6H), 0.84 (s, 9H), 1.19 (s, 6H), 3.67 (s, 2H), 7.26 (d,  $J = 18.6\text{Hz}$ , 1H), 7.62 (d,  $J = 18.6\text{Hz}$ , 1H), 7.89 (d,  $J = 8.7\text{Hz}$ , 2H), 8.24 (d,  $J = 8.7\text{Hz}$ , 2H);  $^{13}\text{C}$  NMR -5.3, 18.4, 21.5, 26.0, 49.1, 70.0, 124.4, 126.1, 129.0, 139.2, 141.6, 148.6, 203.2; HRMS calcd for:  $\text{C}_{19}\text{H}_{30}\text{NSiO}_4$  ( $\text{MH}^+$ ) 364.1944; found 364.1942; IR  $\nu_{\text{max}}$  : 3113, 2955, 2931, 2857, 1682, 1613, 1518, 1345, 1110, 1042, 866, 838, 774  $\text{cm}^{-1}$ .

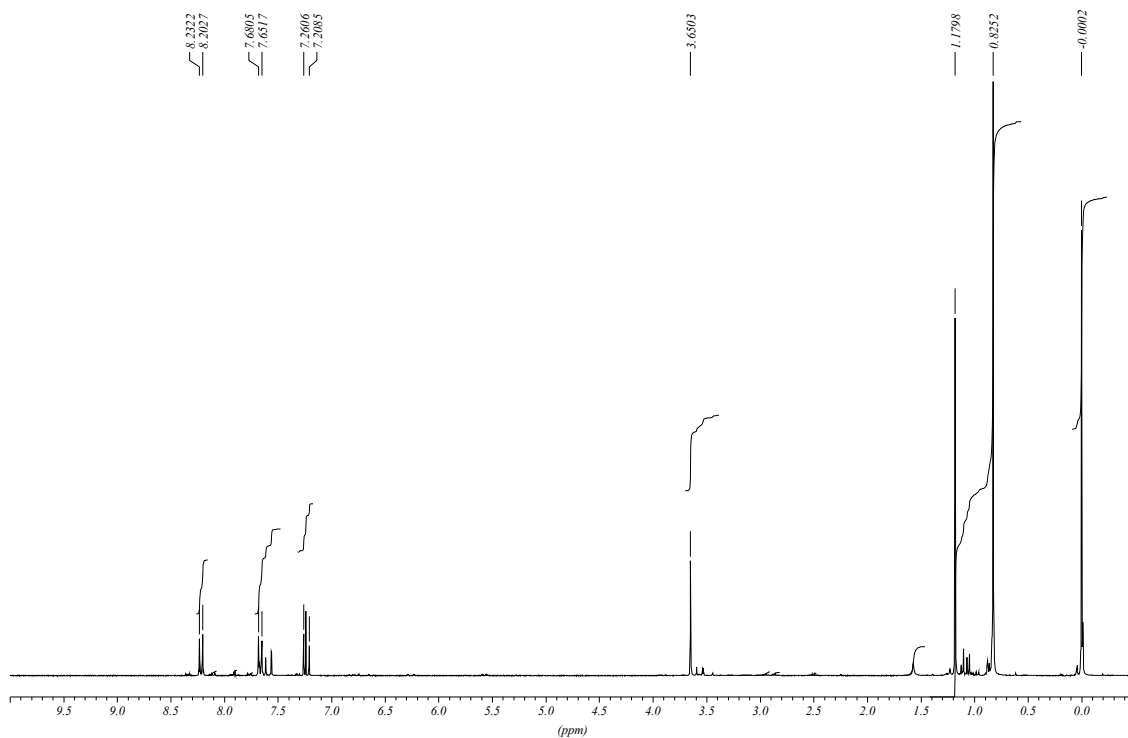

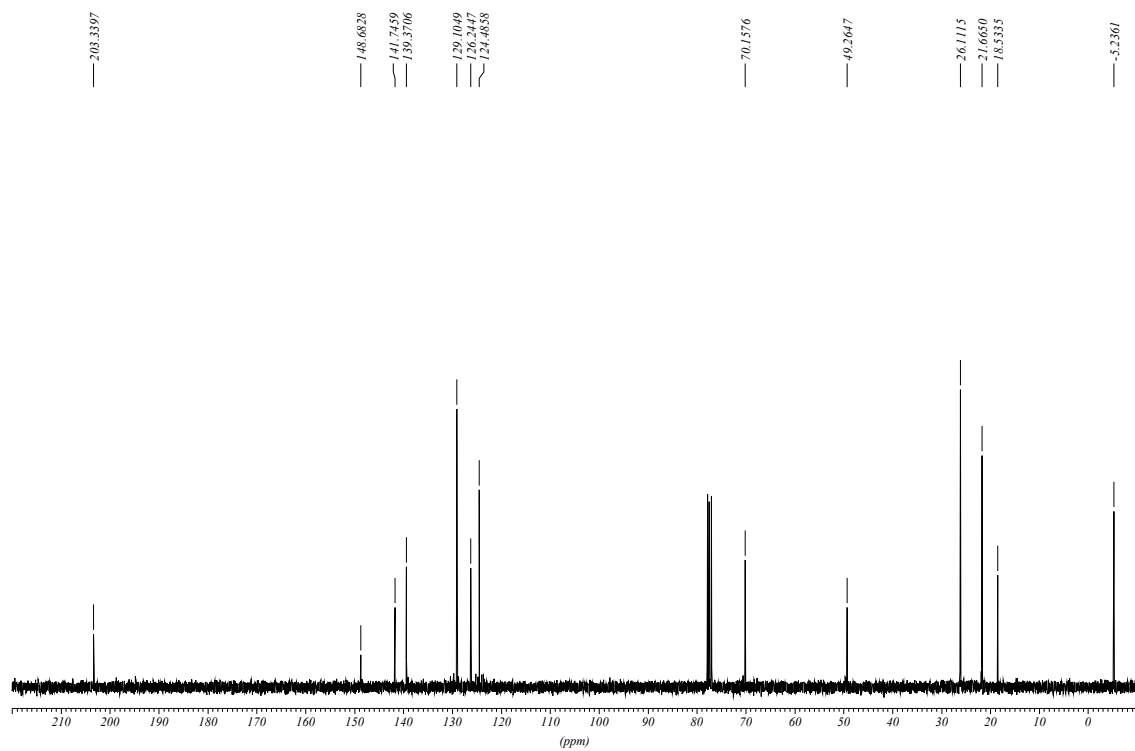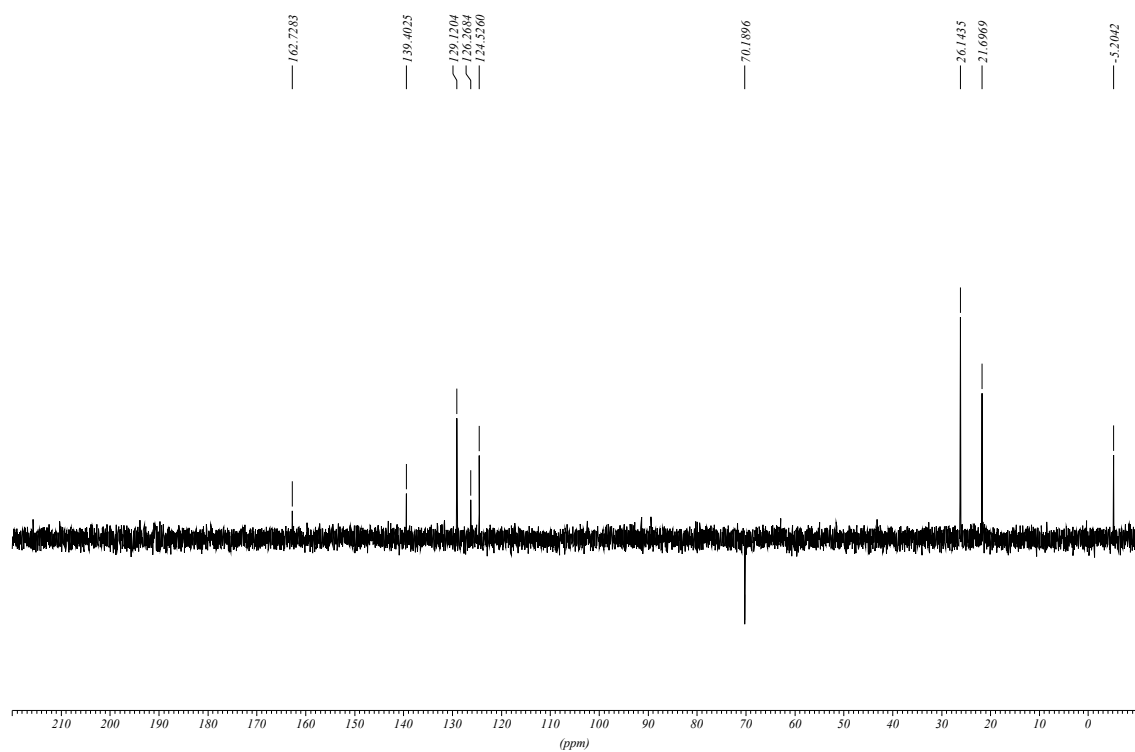

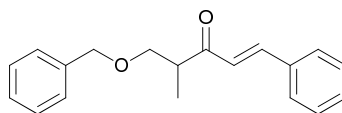

(E)-5-(benzyloxy)-4-methyl-1-phenylpent-1-en-3-one

**3j:**  $^1\text{H}$  NMR  $\delta$  1.11 (d,  $J = 7.2\text{Hz}$ , 3H), 3.16 (m, 1H), 3.47 (dd,  $J = 9.2\text{Hz}$ , 5.9 Hz, 1H), 3.68 (dd,  $J = 9.2\text{Hz}$ , 7.3Hz, 1H), 4.45 (d,  $J = 3\text{Hz}$ , 2H), 6.77 (d,  $J = 16\text{Hz}$ , 1H), 7.22 (m, 5H), 7.32 (m, 3H), 7.48 (m, 2H), 7.56 (d,  $J = 16\text{Hz}$ , 1H);  $^{13}\text{C}$  NMR 14.4, 45.4, 72.7, 73.7, 125.7, 128.0, 128.8, 128.9, 130.8, 135.0, 138.6, 143.2, 202.4; IR (film)  $\nu_{\text{max}}$ : 3060, 3029, 2970, 1686, 1658, 1610, 1099, 1054, 739, 698  $\text{cm}^{-1}$ .

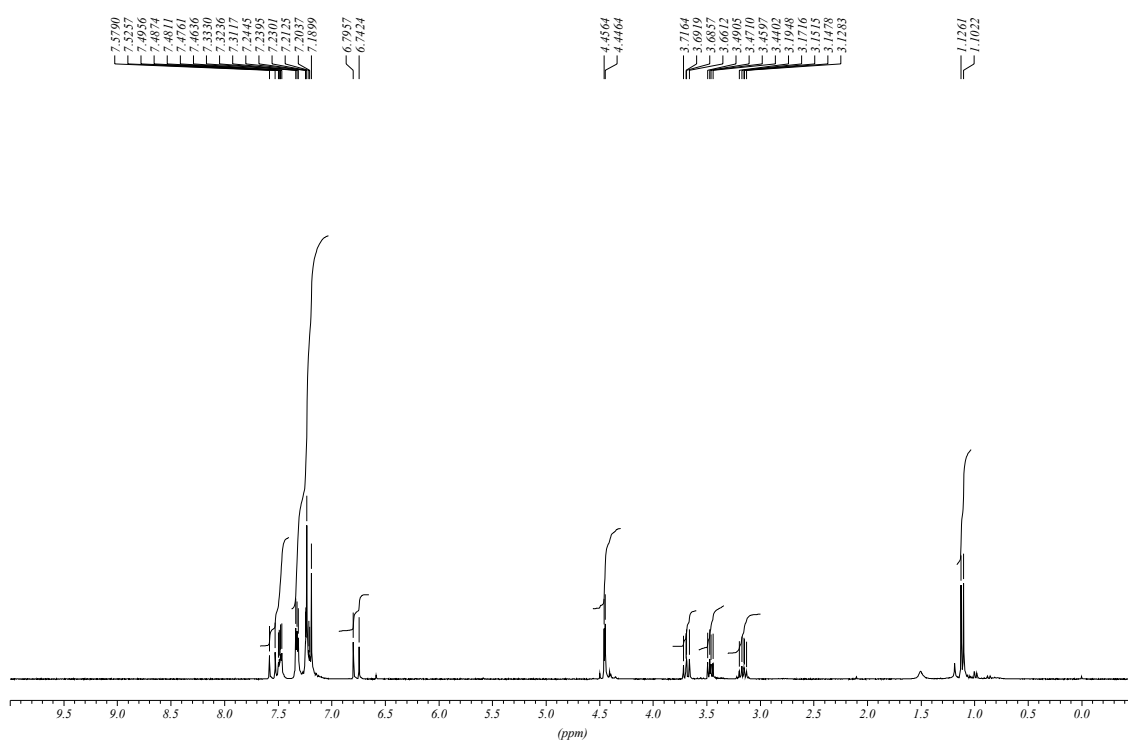

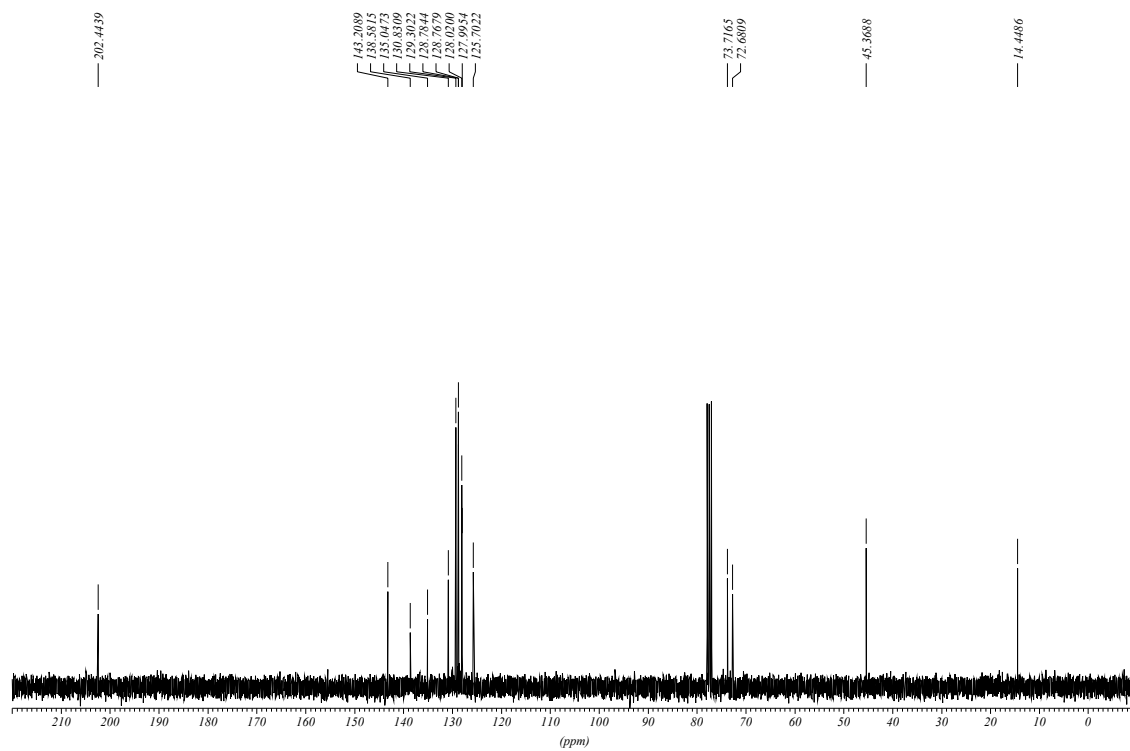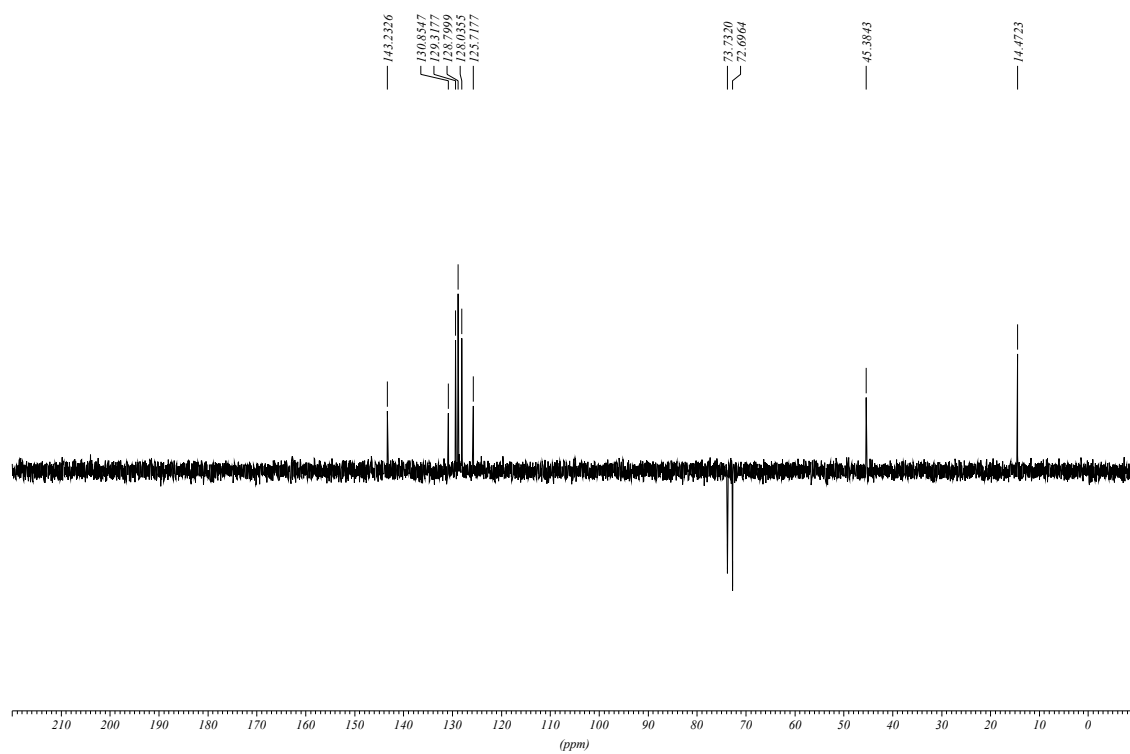

Supplement: b810538c.pdf [file b810538c.pdf]
